# Supplementary material for: Electronic consultations (e-consults) to improve access to specialty care: A systematic review and narrative synthesis
Source: PubMed Central journal article supplement — J Telemed Telecare. 2015 Sep;21(6):323–30. doi: 10.1177/1357633X15582108 (PMC4561452; doi:10.1177/1357633x15582108), 2015-09
Supplement: SUPPLEMENTARY_FILE.pdf [file SUPPLEMENTARY_FILE.pdf]

## **SUPPLEMENTARY FILE**

### **Search strategies for PubMed, CINAHL, EMBASE, and Cochrane Library**

#### **PubMed**

((((electronic[title] AND referral\*[title]) OR (e-consult\*[title] OR e consult\*[title] OR electronic consult\*[title] OR electronic consultation\*[title] OR eReferral\*[title] OR e referrals[title] OR e Referral\*[title] OR electronic referral\*[title] OR electronic consultation\*[title] OR (electronic[title] AND referral[title]))) OR ("Remote Consultation"[Majr] AND (ediagnos\*[title] OR referral[title] OR referring[title] OR e referral\*[title] OR e-referral[title])) OR ("Remote Consultation"[Majr] AND (e-consult\*[title] OR e consult\*[title] OR electronic consult\*[title] OR electronic consultation\*[title] OR eReferral\*[title] OR e referrals[title] OR e Referral\*[title] OR electronic referral\*[title] OR electronic consultation\*[title])) OR ("Remote Consultation"[MAJR] AND (electronic consult\*[tiab] OR econsult\*[tiab] OR e consult\*[tiab] OR ereferr\*[tiab] OR e referr\*[tiab])) OR (electronic referral\*[ti] OR e-referral\*[title] OR e-consult\*[title] OR ereferral\*[title] OR econsult\*[title] OR electronic referral\*[title] OR electronic consult\*[title]) OR (("Electronic Health Records"[Mesh]) AND ("Referral and Consultation/methods"[Majr] OR "Referral and Consultation/organization and administration"[Majr] OR "Referral and Consultation/standards"[Majr] OR "Referral and Consultation/statistics and numerical data"[Majr] OR "Referral and Consultation/trends"[Majr]))) OR ("Electronic Health Records"[Mesh] AND (referr\*[ti] OR ereferr\*[ti] OR e referr\*[ti] OR e consult\*[ti]))

#### **CINAHL**

TI electronic AND referral\* OR e-consult\* OR e consult\* OR electronic consult\* OR electronic consultation\* OR eReferral\* OR e referrals OR e Referral\* OR electronic referral\* OR electronic consultation\* OR TI tele-refer\* OR TI telerefer\* OR MM Remote Consultation AND (TI ediagnos\* OR TI referral OR TI referring OR TI e referral\* OR TI e-referral)  
OR

MM Remote Consultation AND (TI e-consult\* OR TI e consult\* OR TI electronic consult\* OR TI electronic consultation\* OR TI eReferral\* OR TI e referrals OR TI e Referral\* OR TI electronic referral\* OR TI electronic consultation\*)

OR

MM Remote Consultation AND (AB electronic consult\* OR AB econsult\* OR AB e consult\* OR AB ereferr\* OR AB e referr\*)

OR

TI electronic referral\* OR TI e-referral\* OR TI e-consult\* OR TI ereferral\* OR TI econsult\* OR TI electronic referral\* OR TI electronic consult\* OR MM Electronic Health Records AND MM Referral and Consultation OR MM Electronic Health Records AND (TI referr\* OR TI ereferr\* OR TI e referr\* OR TI e consult\*)

#### **Embase.**

#9 #8 AND #5

#8 #7 OR #6 OR #4 OR #3 OR #2 OR #1

#7 'e referral':ab,ti OR 'e referrals':ab,ti OR 'tele referrals':ab,ti OR 'econsultation':ab,ti OR 'teleconsultation':ab,ti OR 'teleconsultations':ab,ti OR 'virtual consultation':ab,ti OR 'virtual consultations':ab,ti

#6 'remote consultation':ab,ti OR 'teleconsultation':ab,ti AND clinicians:ab,ti

#5 'electronic communication':ab,ti OR 'electronic medical records':de,ab,ti OR emrs:ti OR emr:ab,ti OR 'electronic medical record':ab,ti

#4 'virtual consults':ab,ti OR 'virtual consult':ab,ti OR 'virtual consultation':ab,ti

#3 'e consultations':ti OR 'e consults':ti OR (electronic:ti AND consult:ti) OR (electronic:de AND medical:de AND record:de AND consult\*:ti)

#2 'electronic consults':ab,ti OR 'electronic consultation':ab,ti OR 'electronic consultations':ab,ti

#1 'e consults':ti OR 'e consultations':ti OR (tele:ti AND consult:ti) OR teleconsults:ti,ab

**Cochrane Library** "electronic referral\*" OR ereferr\* OR econsult\*
